# Supplementary material for: Analysis of growth factor signaling in genetically diverse breast cancer lines
Source: PubMed Central journal article supplement (PMC4234128; doi:10.1186/1741-7007-12-20), 2014-03-21
Supplement: 1741-7007-12-20-S4.pdf [file 1741-7007-12-20-S4.pdf]

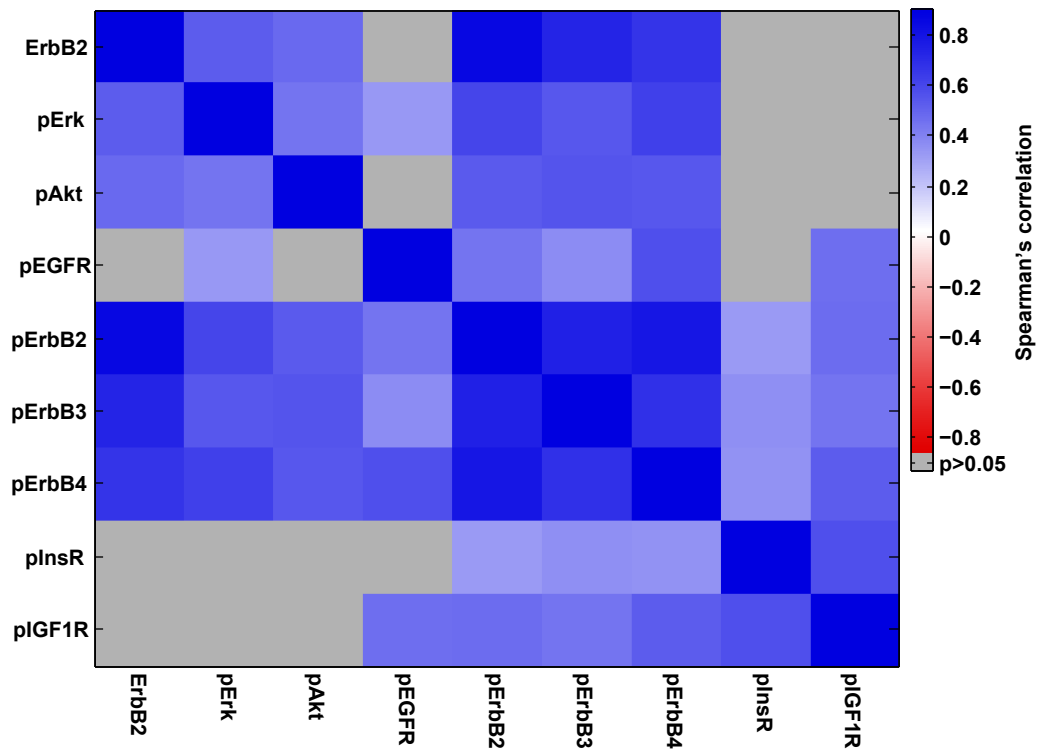

**SUPPLEMENTAL FIGURE S1:**

**Correlation between selected basal measurements.** Correlations between pairs of basal expression or phosphorylation levels of selected RTKs. Blue and red squares denote positive and negative Spearman's correlation respectively, with darker colors denoting a higher correlation coefficient. Gray squares signify non-significant correlations.
