# Supplementary material for: Analysis of growth factor signaling in genetically diverse breast cancer lines
Source: PubMed Central journal article supplement (PMC4234128; doi:10.1186/1741-7007-12-20), 2014-03-21
Supplement: 1741-7007-12-20-S8.pdf [file 1741-7007-12-20-S8.pdf]

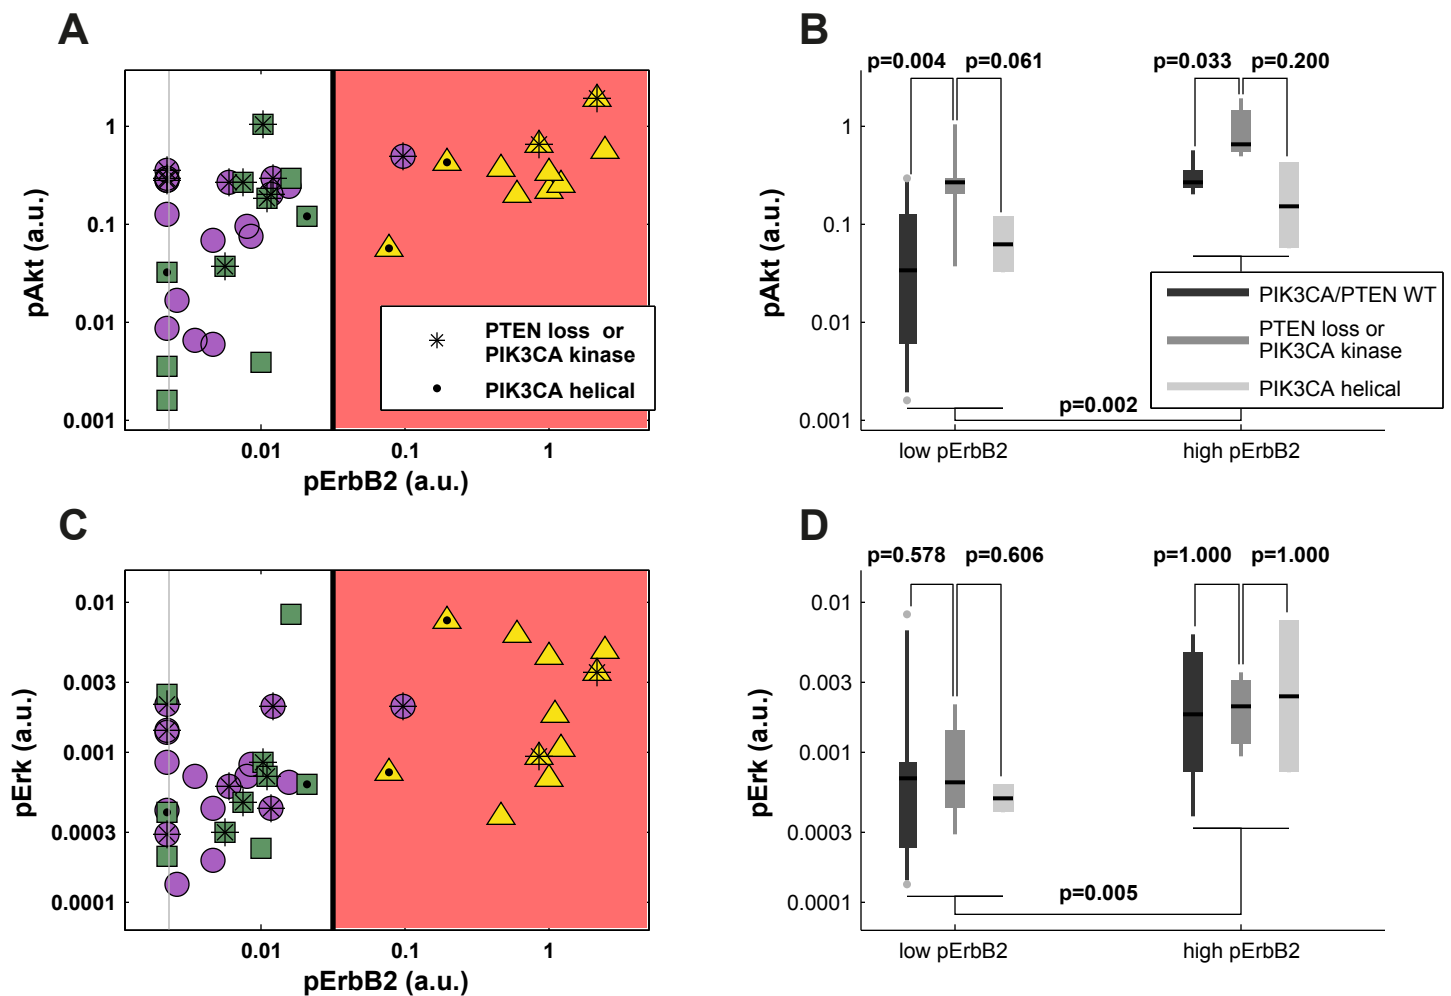

#### SUPPLEMENTAL FIGURE S4:

#### Relationship between basal pErbB2, PI3K/PTEN mutational status and the basal levels of pAKT and pERK.

(A) Cell lines with high pErbB2 (red zone) have high pAKT levels ( $p = 0.002$ , Wilcoxon rank-sum test) independently of their PIK3CA mutation status (star for PTEN loss of function or PIK3CA kinase domain mutation; dot for PIK3CA helical domain mutation). (B) Cell lines with a PTEN loss of function or a PIK3CA kinase domain mutation have higher pAKT levels than the wild type ones in both groups of low and high pErbB2 level ( $p = 0.004$  and  $p = 0.033$  respectively, Wilcoxon rank-sum test). (C) Cell lines with high pErbB2 (red zone) have high pERK ( $p = 0.005$ , Wilcoxon rank-sum test). (D) PTEN or PIK3CA mutation status has no impact of the level of pERK ( $p > 0.05$ , Wilcoxon rank-sum test).
